# Supplementary material for: Erratum for “Semiexplicit Unconditionally Stable Time Integration for Dynamic Analysis Based on Composite Scheme” by Amir Hossein Namadchi, Farhang Fattahi, and Javad Alamatian
Source: Atypon-hosted journal article supplement (doi:10.1061/(asce)em.1943-7889.0001413), 2017-08-18
Supplement: supplemental_data_em.1943-7889.0001413_namadchi.pdf [file supplemental_data_em.1943-7889.0001413_namadchi.pdf]

## SUPPLEMENTAL DATA

*ASCE Journal of Engineering Mechanics*

# Erratum for “Semiexplicit Unconditionally Stable Time Integration for Dynamic Analysis Based on Composite Scheme” by Amir Hossein Namadchi, Farhang Fattahi, and Javad Alamatian

Amir Hossein Namadchi, Farhang Fattahi, and Javad Alamatian

**DOI:** 10.1061/(ASCE)EM.1943-7889.0001413

© ASCE 2017

[www.ascelibrary.org](http://www.ascelibrary.org)

The correct equations are as follows:

|                                                                                                                                                                                                                                                                                                                                                                                                                                                                  |      |
|------------------------------------------------------------------------------------------------------------------------------------------------------------------------------------------------------------------------------------------------------------------------------------------------------------------------------------------------------------------------------------------------------------------------------------------------------------------|------|
| $D_{n+1} = D_n + \alpha_1 \Delta t \dot{D}_n + \alpha_2 \Delta t^2 \ddot{D}_n$                                                                                                                                                                                                                                                                                                                                                                                   | (2)  |
| $\dot{D}_{n+1} = \dot{D}_n + \beta_1 \Delta t \ddot{D}_n + \beta_2 \Delta t \ddot{D}_{n+1}$                                                                                                                                                                                                                                                                                                                                                                      | (3)  |
| $\delta_{n+1} = \frac{k_{n+1}}{k_0}$                                                                                                                                                                                                                                                                                                                                                                                                                             | (8)  |
| $\{\tilde{\mathbf{D}}\}_{n+1} = [\mathbf{A}]_{n+1} \{\tilde{\mathbf{D}}\}_n$                                                                                                                                                                                                                                                                                                                                                                                     | (10) |
| $[\mathbf{A}]_{n+1} = \frac{-1}{1+2\beta_2\zeta\Omega_0} \begin{pmatrix} -(1+2\beta_2\zeta\Omega_0) & -\alpha_1(1+2\beta_2\zeta\Omega_0) & -\alpha_2(1+2\beta_2\zeta\Omega_0) \\ \beta_2\delta_{n+1}\Omega_0^2 & \alpha_1\beta_2\delta_{n+1}\Omega_0^2 - 1 & \alpha_2\beta_2\delta_{n+1}\Omega_0^2 - \beta_1 \\ \delta_{n+1}\Omega_0^2 & \alpha_1\delta_{n+1}\Omega_0^2 + 2\zeta\Omega_0 & \alpha_2\delta_{n+1}\Omega_0^2 + 2\beta_1\zeta\Omega_0 \end{pmatrix}$ | (11) |
| $ [\mathbf{A}]_{n+1} - \lambda[\mathbf{I}]  = 0$                                                                                                                                                                                                                                                                                                                                                                                                                 | (12) |
| $\lambda^3 - A_1\lambda^2 + A_2\lambda - A_3 = 0$                                                                                                                                                                                                                                                                                                                                                                                                                | (13) |
| $\mu_{n+1} = \left  1 - \delta_{n+1} \pm i \sqrt{\delta_{n+1}(\delta_{n+1} - 1)} \right  \quad \delta_{n+1} \leq 1$                                                                                                                                                                                                                                                                                                                                              | (17) |
| $D_{n+1} = e^{-\bar{\zeta}_{n+1}\varpi_{n+1}t_{n+1}} (c_1 \cos \varpi_{n+1}t_{n+1} + c_2 \sin \varpi_{n+1}t_{n+1})$                                                                                                                                                                                                                                                                                                                                              | (18) |
| $PE_{n+1} = \frac{\bar{T}_{n+1} - T_{n+1}}{T_{n+1}} = \frac{\Omega_0 \sqrt{\delta_{n+1}} - 1}{\varphi_{n+1}}$                                                                                                                                                                                                                                                                                                                                                    | (21) |
| $[\alpha_1] = [\mathbf{Q}_1]^{-1} (144[\mathbf{I}] - 5[\mathbf{W}] + 12[\mathbf{Z}]^2 + [\mathbf{Z}](84[\mathbf{I}] + [\mathbf{W}]))$                                                                                                                                                                                                                                                                                                                            | (25) |
| $[\alpha_2] = [\mathbf{Q}_1]^{-1} (72[\mathbf{I}] + 12[\mathbf{Z}] + [\mathbf{W}])$                                                                                                                                                                                                                                                                                                                                                                              | (26) |
| $[\beta_1] = 72[\mathbf{Q}_2]^{-1}$                                                                                                                                                                                                                                                                                                                                                                                                                              | (27) |
| $[\beta_2] = [\mathbf{Q}_2]^{-1} (72[\mathbf{I}] + 12[\mathbf{Z}] + [\mathbf{W}])$                                                                                                                                                                                                                                                                                                                                                                               | (28) |
| $[\mathbf{W}] = \Delta t^2 [\mathbf{M}]^{-1} [\mathbf{K}]_0$                                                                                                                                                                                                                                                                                                                                                                                                     | (29) |
| $[\mathbf{Z}] = \Delta t [\mathbf{M}]^{-1} [\mathbf{C}]$                                                                                                                                                                                                                                                                                                                                                                                                         | (30) |
| $[\mathbf{Q}_1] = (9[\mathbf{I}] + 3[\mathbf{Z}] + [\mathbf{W}])(16[\mathbf{I}] + 4[\mathbf{Z}] + [\mathbf{W}])$                                                                                                                                                                                                                                                                                                                                                 | (31) |
| $[\mathbf{Q}_2] = 144[\mathbf{I}] + 12[\mathbf{Z}] - 5[\mathbf{W}]$                                                                                                                                                                                                                                                                                                                                                                                              | (32) |

|                                                                                                                                                                                                                                                                                                                                                                                                                                                                                                                                         |      |
|-----------------------------------------------------------------------------------------------------------------------------------------------------------------------------------------------------------------------------------------------------------------------------------------------------------------------------------------------------------------------------------------------------------------------------------------------------------------------------------------------------------------------------------------|------|
| $\{\mathbf{D}\}_{n+1} = \{\mathbf{D}\}_n + \Delta t [\mathbf{a}_1] \{\dot{\mathbf{D}}\}_n + \Delta t^2 [\mathbf{a}_2] \{\ddot{\mathbf{D}}\}_n$                                                                                                                                                                                                                                                                                                                                                                                          | (33) |
| $([\mathbf{M}] + \Delta t [\mathbf{C}][\boldsymbol{\beta}_2]) \{\ddot{\mathbf{D}}\}_{n+1} = (\{\mathbf{P}\}_{n+1} - \{\mathbf{f}\}_{n+1} - [\mathbf{C}]\{\dot{\mathbf{D}}\}_n - \Delta t [\mathbf{C}][\boldsymbol{\beta}_1] \{\ddot{\mathbf{D}}\}_n)$                                                                                                                                                                                                                                                                                   | (34) |
| $\{\dot{\mathbf{D}}\}_{n+1} = \{\dot{\mathbf{D}}\}_n + \Delta t [\boldsymbol{\beta}_1] \{\ddot{\mathbf{D}}\}_n + \Delta t [\boldsymbol{\beta}_2] \{\dot{\mathbf{D}}\}_{n+1}$                                                                                                                                                                                                                                                                                                                                                            | (35) |
| $A_{33} = \frac{\delta_{1+n}(144 - 120\zeta\Omega_0 - 47\Omega_0^2)}{(9 + 6\zeta\Omega_0 + \Omega_0^2)(16 + 8\zeta\Omega_0 + \Omega_0^2)} - \frac{\delta_{1+n}(144 - 120\zeta\Omega_0 - 5\Omega_0^2) + 144\zeta\Omega_0}{144 + 2\zeta\Omega_0(84 + \Omega_0^2) + 48\zeta^2\Omega_0^2 - 5\Omega_0^2}$                                                                                                                                                                                                                                    | (47) |
| $[\mathbf{A}] = \frac{1}{(9 + 6\zeta\Omega + \Omega^2)(16 + 8\zeta\Omega + \Omega^2)}$<br>$\times \begin{pmatrix} 144 + 168\zeta\Omega + (48\zeta^2 - 19)\Omega^2 - 2\zeta\Omega^3 & 144 + 80\zeta\Omega + (16\zeta^2 - 5)\Omega^2 & 8\zeta\Omega + 28 \\ \Omega^2(\Omega^2 - 24\zeta\Omega - 96) & 144 - 47\Omega^2 - 8\zeta\Omega(3 + \Omega^2) & 48 - 4\Omega^2 \\ \Omega^2(19\Omega^2 + 24\zeta\Omega - 144) & -288\zeta\Omega + 48(\zeta^2 - 3)\Omega^2 + 14\zeta\Omega^3 + 5\Omega^4 & -4\Omega(24\zeta + 7\Omega) \end{pmatrix}$ | (48) |
| $\begin{Bmatrix} D_{n+1} \\ \Delta t \dot{D}_{n+1} \end{Bmatrix} = \frac{1}{1 + 2\zeta\Omega\beta_2} \begin{pmatrix} (1 - \Omega^2\alpha_2)(1 + 2\zeta\Omega\beta_2) & (\alpha_1 - 2\zeta\Omega\alpha_2)(1 + 2\zeta\Omega\beta_2) \\ \Omega^2((\Omega^2\alpha_2 - 1)\beta_2 - \beta_1) & 1 - 2\zeta\Omega\beta_1 + \Omega^2(2\zeta\Omega\alpha_2 - \alpha_1)\beta_2 \end{pmatrix} \begin{Bmatrix} D_n \\ \Delta t \dot{D}_n \end{Bmatrix}$                                                                                              | (49) |
| $\begin{Bmatrix} D_{n+1} \\ \Delta t \dot{D}_{n+1} \end{Bmatrix} = \frac{1}{(9 + 6\zeta\Omega + \Omega^2)(16 + 8\zeta\Omega + \Omega^2)}$<br>$\times \begin{pmatrix} 144 + 168\zeta\Omega + (48\zeta^2 - 47)\Omega^2 - 10\zeta\Omega^3 & 144 + 24\zeta\Omega - 5\Omega^2 \\ \Omega^2(5\Omega^2 - 24\zeta\Omega - 144) & -47\Omega^2 - 120\zeta\Omega + 144 \end{pmatrix} \begin{Bmatrix} D_n \\ \Delta t \dot{D}_n \end{Bmatrix}$                                                                                                       | (50) |
| $N([\hat{\mathbf{a}}_1]) = 144[\mathbf{I}] - 5[\hat{\boldsymbol{\Omega}}]_0^2 + 48([\hat{\boldsymbol{\zeta}}][\hat{\boldsymbol{\Omega}}]_0)^2 + 2[\hat{\boldsymbol{\zeta}}][\hat{\boldsymbol{\Omega}}]_0(84[\mathbf{I}] + [\hat{\boldsymbol{\Omega}}]_0^2)$<br>$D([\hat{\mathbf{a}}_1]) = (9[\mathbf{I}] + 6[\hat{\boldsymbol{\zeta}}][\hat{\boldsymbol{\Omega}}]_0 + [\hat{\boldsymbol{\Omega}}]_0^2)(16[\mathbf{I}] + 8[\hat{\boldsymbol{\zeta}}][\hat{\boldsymbol{\Omega}}]_0 + [\hat{\boldsymbol{\Omega}}]_0^2)$                    | (52) |
| $[\hat{\mathbf{M}}]\{\ddot{\mathbf{Y}}\} + [\hat{\mathbf{C}}]\{\dot{\mathbf{Y}}\} + [\hat{\mathbf{K}}]_0\{\mathbf{Y}\} = \{\mathbf{0}\}$                                                                                                                                                                                                                                                                                                                                                                                                | (53) |
| $\{\mathbf{Y}\}_{n+1} = \{\mathbf{Y}\}_n + \Delta t [\hat{\mathbf{a}}_1] \{\dot{\mathbf{Y}}\}_n + \Delta t^2 [\hat{\mathbf{a}}_2] \{\ddot{\mathbf{Y}}\}_n$                                                                                                                                                                                                                                                                                                                                                                              | (61) |
| $[\mathbf{a}_1] = [\boldsymbol{\Phi}](D([\hat{\mathbf{a}}_1])^{-1}N([\hat{\mathbf{a}}_1]))[\boldsymbol{\Phi}]^{-1}$<br>$= ([\boldsymbol{\Phi}]D([\hat{\mathbf{a}}_1])^{-1}[\boldsymbol{\Phi}]^{-1})([\boldsymbol{\Phi}]N([\hat{\mathbf{a}}_1])[\boldsymbol{\Phi}]^{-1})$                                                                                                                                                                                                                                                                | (65) |
| $N([\hat{\mathbf{a}}_2]) = 72[\mathbf{I}] + 24[\hat{\boldsymbol{\zeta}}][\hat{\boldsymbol{\Omega}}]_0 + [\hat{\boldsymbol{\Omega}}]_0^2 =$<br>$72[\mathbf{I}] + 12\Delta t [\boldsymbol{\Phi}]^{-1}[\mathbf{M}]^{-1}[\mathbf{C}][\boldsymbol{\Phi}] + \Delta t^2 [\boldsymbol{\Phi}]^{-1}[\mathbf{M}]^{-1}[\mathbf{K}]_0[\boldsymbol{\Phi}]$                                                                                                                                                                                            | (67) |

|                                                                                                                                                                                                                                                                                                                                                                                                                               |      |
|-------------------------------------------------------------------------------------------------------------------------------------------------------------------------------------------------------------------------------------------------------------------------------------------------------------------------------------------------------------------------------------------------------------------------------|------|
| $[\mathbf{a}_2] = \left[ \begin{array}{c} \left( 9[\mathbf{I}] + 3\Delta t [\mathbf{M}]^{-1} [\mathbf{C}] + \Delta t^2 [\mathbf{M}]^{-1} [\mathbf{K}]_0 \right) \left( 16[\mathbf{I}] + 4\Delta t [\mathbf{M}]^{-1} [\mathbf{C}] + \Delta t^2 [\mathbf{M}]^{-1} [\mathbf{K}]_0 \right) \\ 72[\mathbf{I}] + 12\Delta t [\mathbf{M}]^{-1} [\mathbf{C}] + \Delta t^2 [\mathbf{M}]^{-1} [\mathbf{K}]_0 \end{array} \right]^{-1}.$ | (69) |
| $D([\hat{\boldsymbol{\beta}}_1]) = D([\hat{\boldsymbol{\beta}}_2]) = 144[\mathbf{I}] + 24[\hat{\boldsymbol{\zeta}}][\hat{\boldsymbol{\Omega}}]_0 - 5[\hat{\boldsymbol{\Omega}}]_0^2 =$ $144[\mathbf{I}] + 12\Delta t [\boldsymbol{\Phi}]^{-1} [\mathbf{M}]^{-1} [\mathbf{C}][\boldsymbol{\Phi}] - 5\Delta t^2 [\boldsymbol{\Phi}]^{-1} [\mathbf{M}]^{-1} [\mathbf{K}]_0 [\boldsymbol{\Phi}]$                                  | (72) |
